# Supplementary material for: Inhibition of PI3K pathway increases immune infiltrate in muscle-invasive bladder cancer
Source: PubMed Central journal article supplement — Oncoimmunology. 2019 Mar 16;8(5):e1581556. doi: 10.1080/2162402X.2019.1581556 (PMC6492984; doi:10.1080/2162402x.2019.1581556), 2019-03-16
Supplement: koni-08-05-1581556-s001.pdf [file koni-08-05-1581556-s001.pdf]

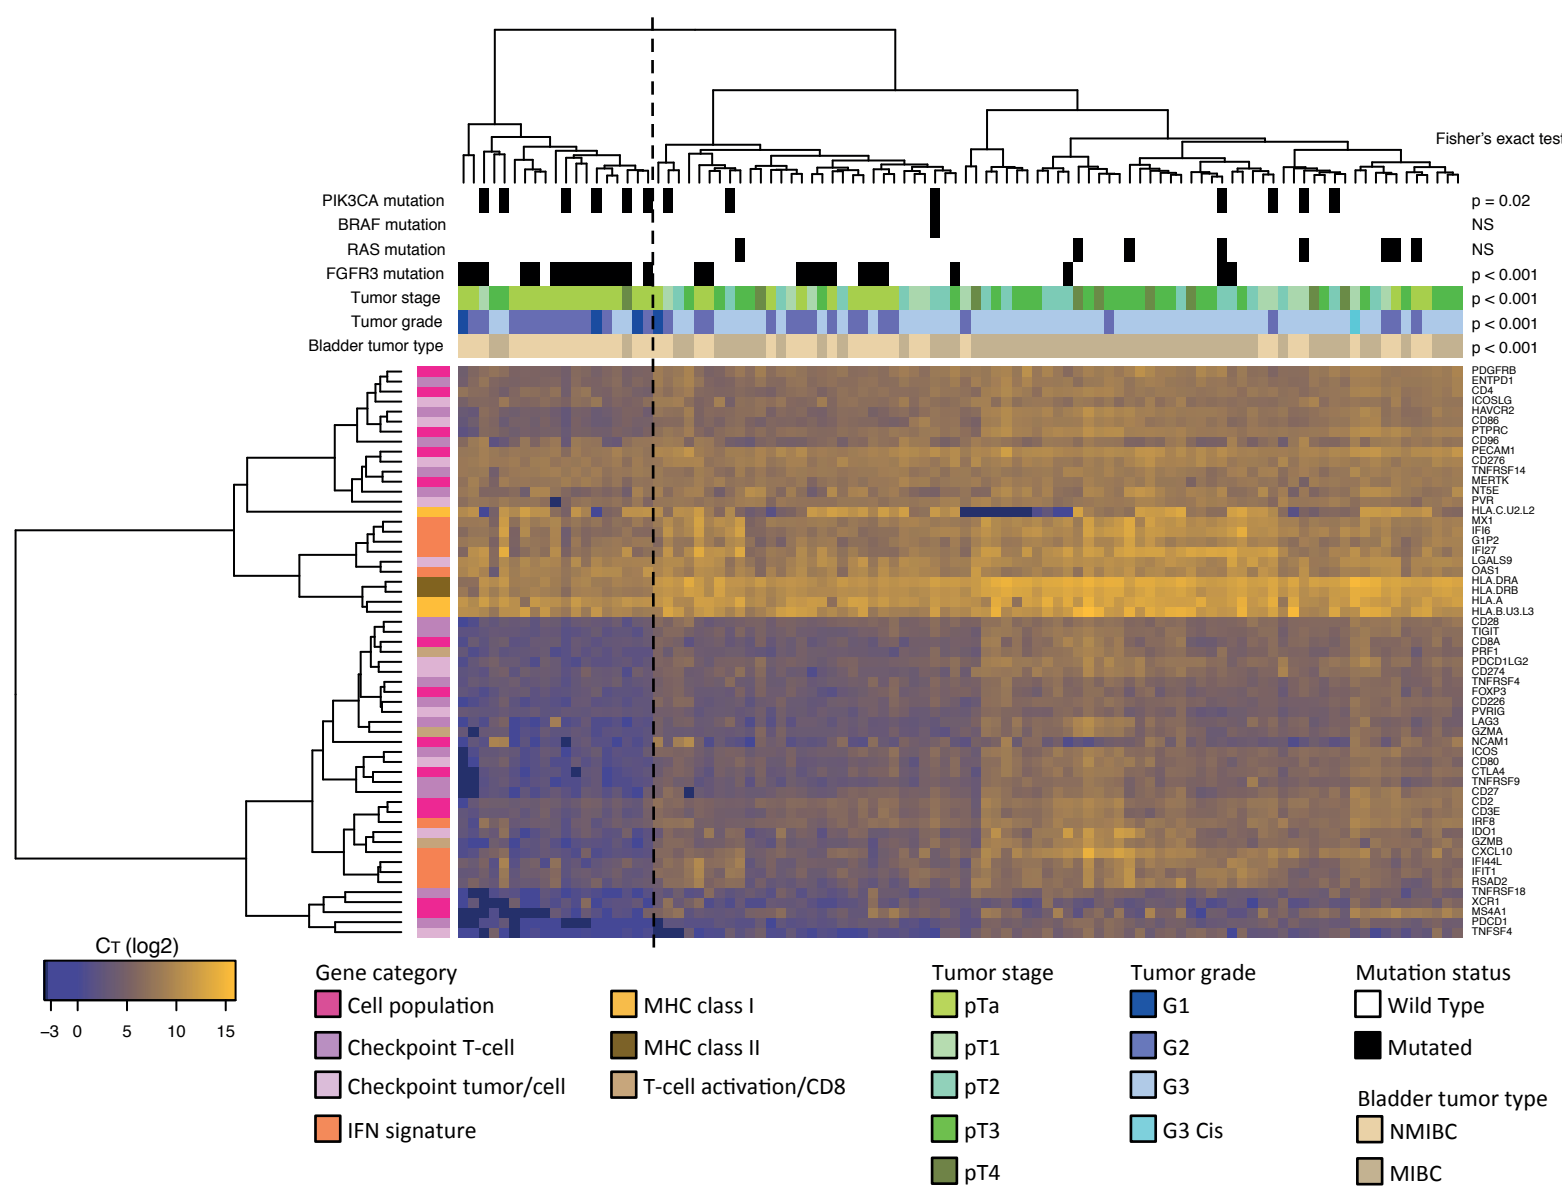

Supplementary Figure 1.

**VMCUB1, PIK3CA-mutated**

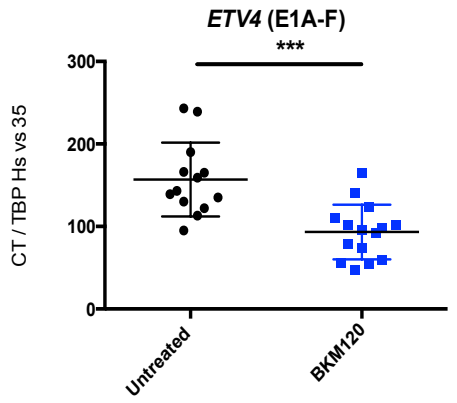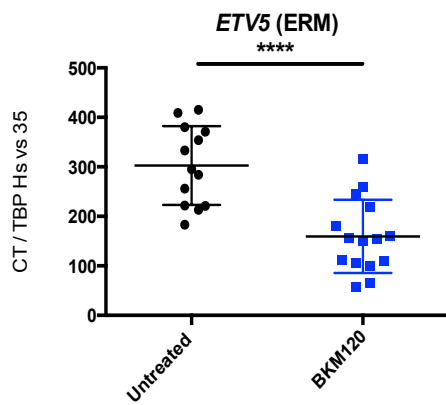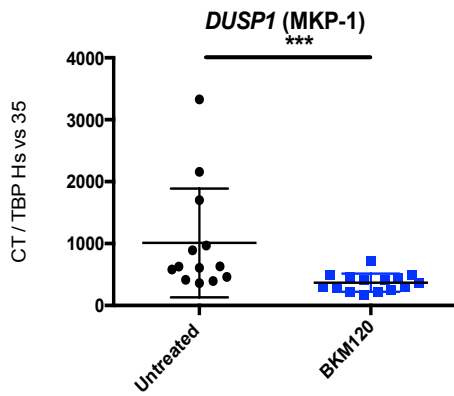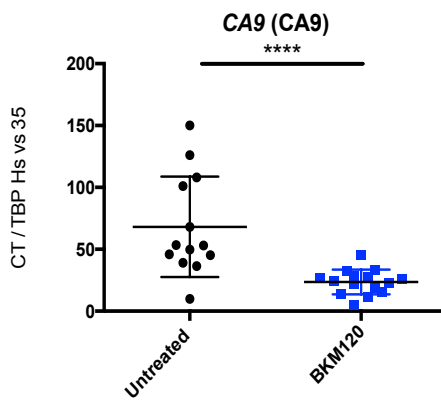

**HT1376, PIK3CA-wild type**

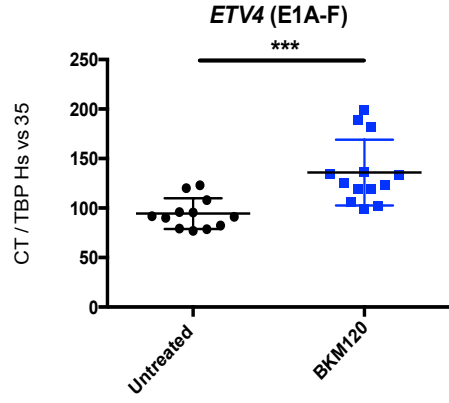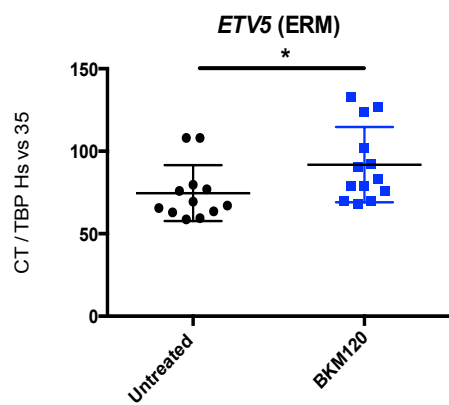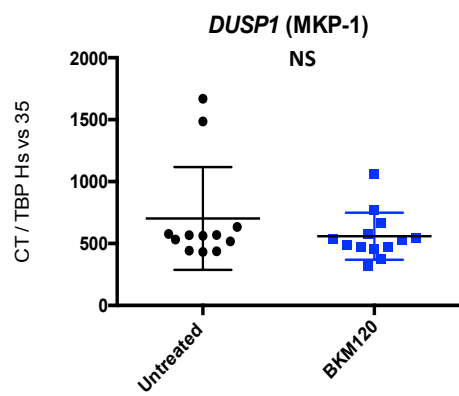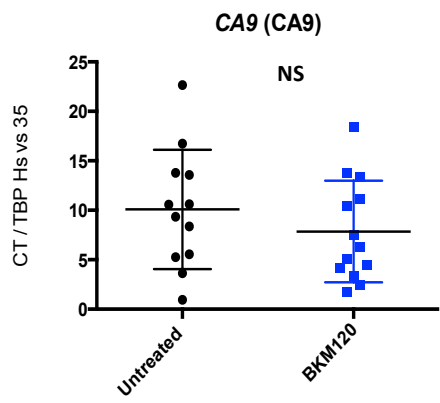

**Supplementary Figure 2.**

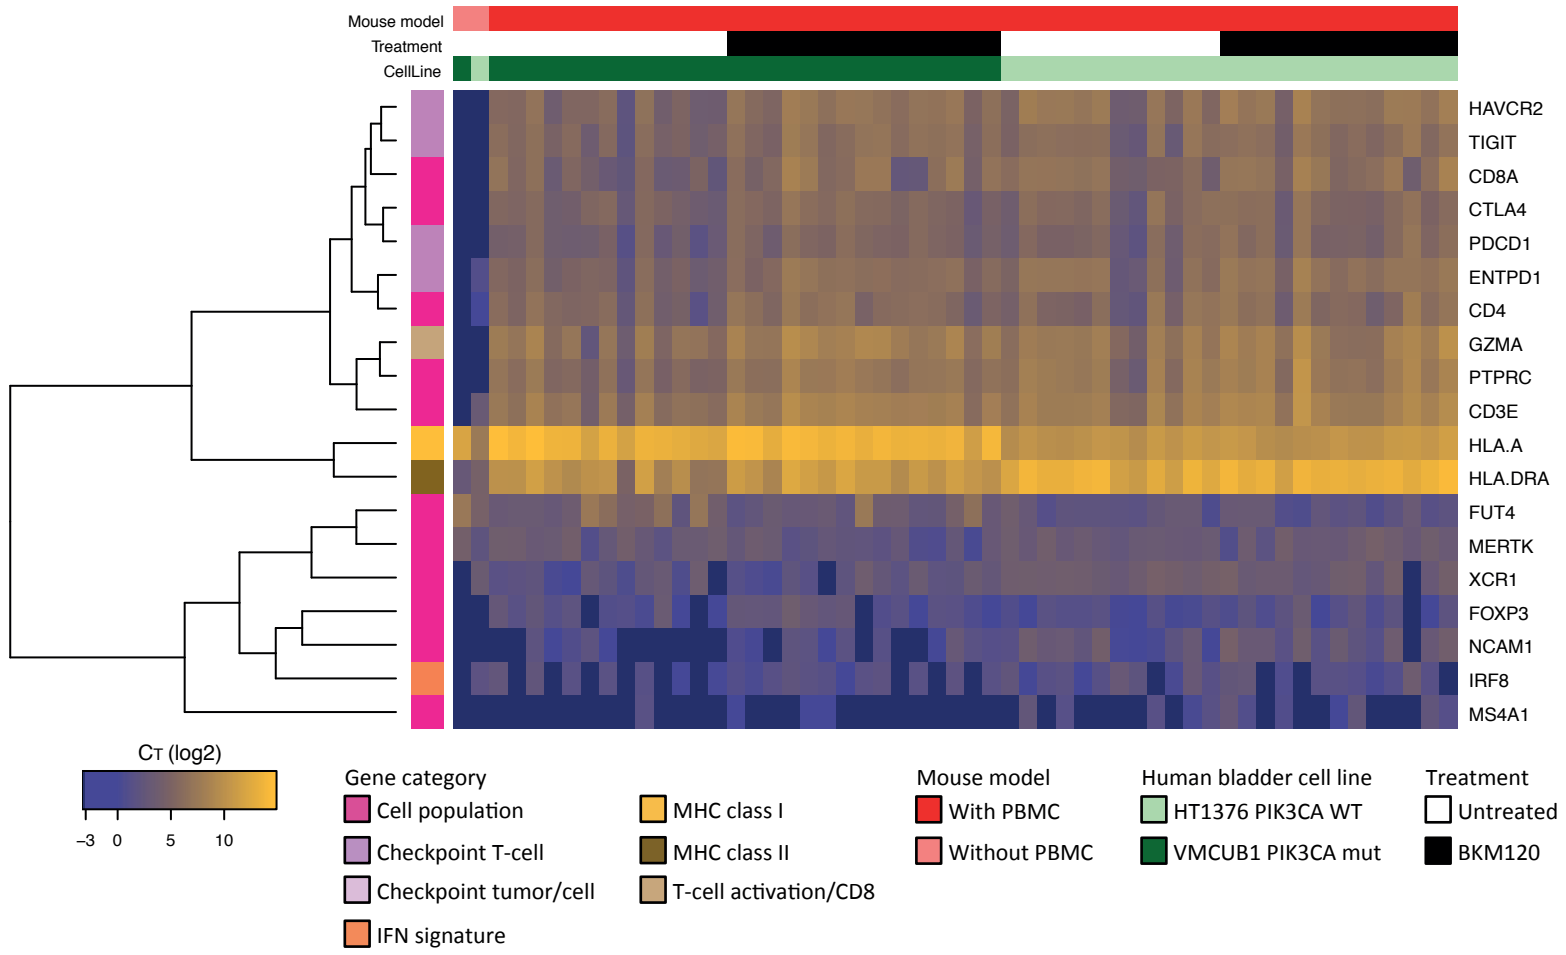

Supplementary Figure 3.

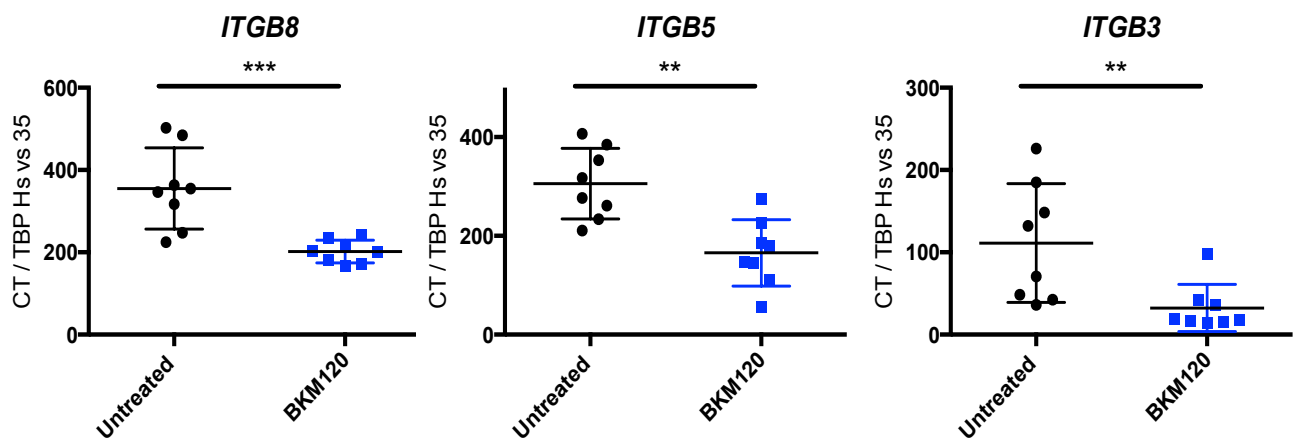

Supplementary Figure 4.

Without PBMC

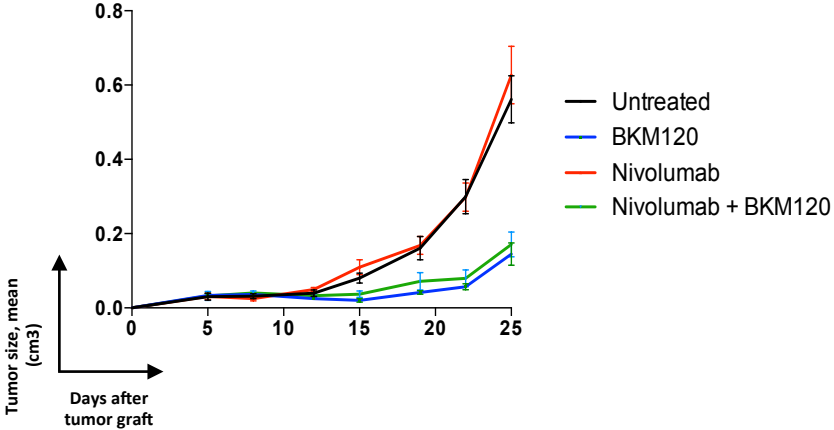

Supplementary Figure 5.
